# Supplementary material for: Structural characterization of eutectic aqueous NaCl solutions under variable temperature and pressure conditions
Source: Royal Society of Chemistry journal article supplement (doi:10.1039/c5cp00224a), 2015-01-01
Supplement: c5cp00224a1.pdf [file c5cp00224a1.pdf]

## 1 Supplementary Material

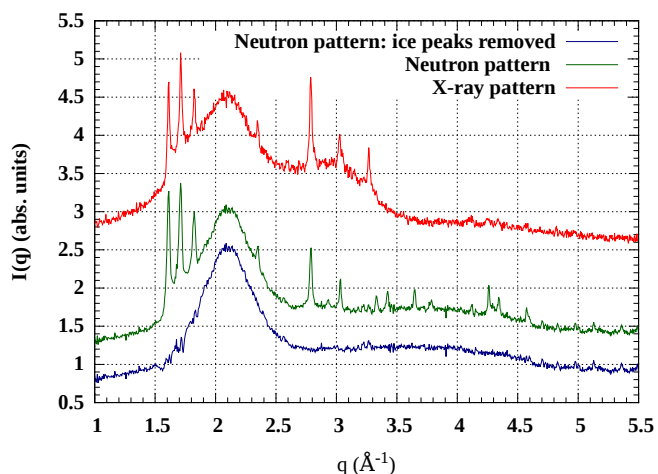

**Fig. 1** Diffraction patterns of  $\text{NaCl} \cdot 10.2\text{D}_2\text{O}$  at 90 K measured by neutron (green) and X-ray diffraction (red). The blue line shows the neutron spectrum from which the crystalline contribution has been removed as in figures ?? and ??.

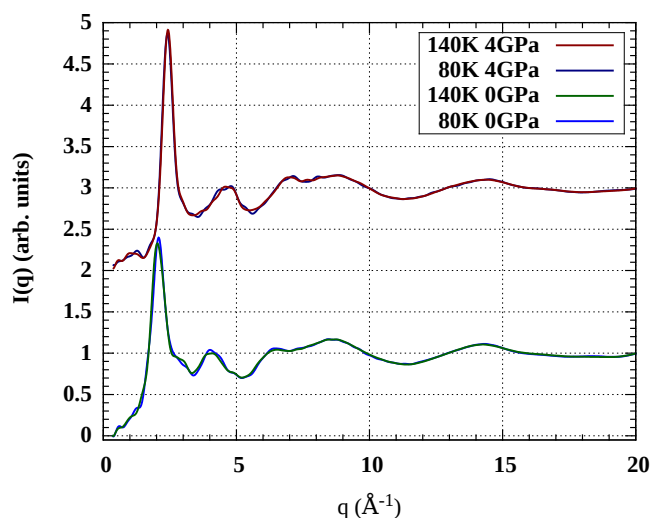

**Fig. 2** Structure factors of  $\text{NaCl} \cdot 10.2\text{D}_2\text{O}$  at 0 and 4 GPa. At both pressures the data for 80 and 140 K are superposed to show that they barely change with temperature.

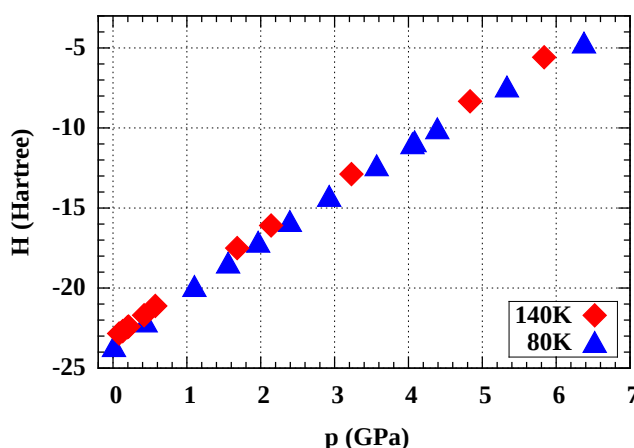

**Fig. 3** Pressure dependence of the enthalpy at 80 K (blue triangles) and 140 K (red diamonds) of the  $\text{NaCl} \cdot 10.2\text{D}_2\text{O}$  solution in our MD simulations.
